# Supplementary material
Source: Springer Nature journal article supplement (https://www.springermedizin.de/resource/supplementary/12887_2009_345_MOESM2_ESM.pdf/9474892)
Supplement: MOESM2 [file 9474892]

Enrolled n = 149

Did not return  
n = 14 ( 1 died)

Followed-up n = 135

Died n = 19

Lost n = 11  
Transfer n = 6

Remain in active follow-up  
n = 99
